# Supplementary material for: Blue light-emitting polymers containing fluorene-based benzothiophene-S,S-dioxide derivatives
Source: Royal Society of Chemistry journal article supplement (doi:10.1039/c5tc03197d), 2016-01-01
Supplement: c5tc03197d1.pdf [file c5tc03197d1.pdf]

## Supporting Information

### Blue light-emitting polymers containing fluorene-based benzothiophene -*S,S*-dioxide derivative

Liwen Hu, Yong Yang, Jin Xu, Junfei Liang, Ting Guo,\* Bin Zhang, Wei Yang\* and Yong Cao

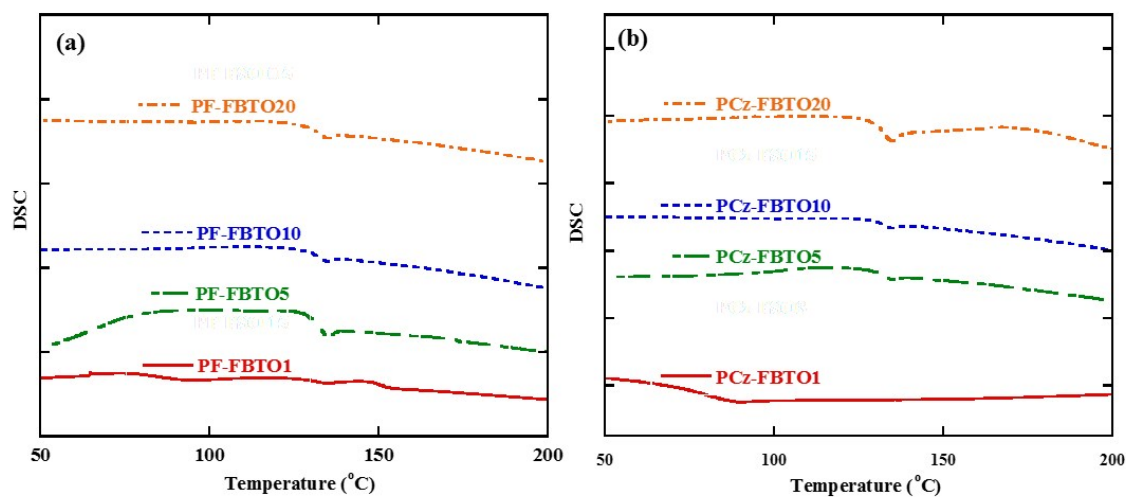

Fig. S1 DSC curves of copolymers PF-FBTOs and PCz-FBTOs.

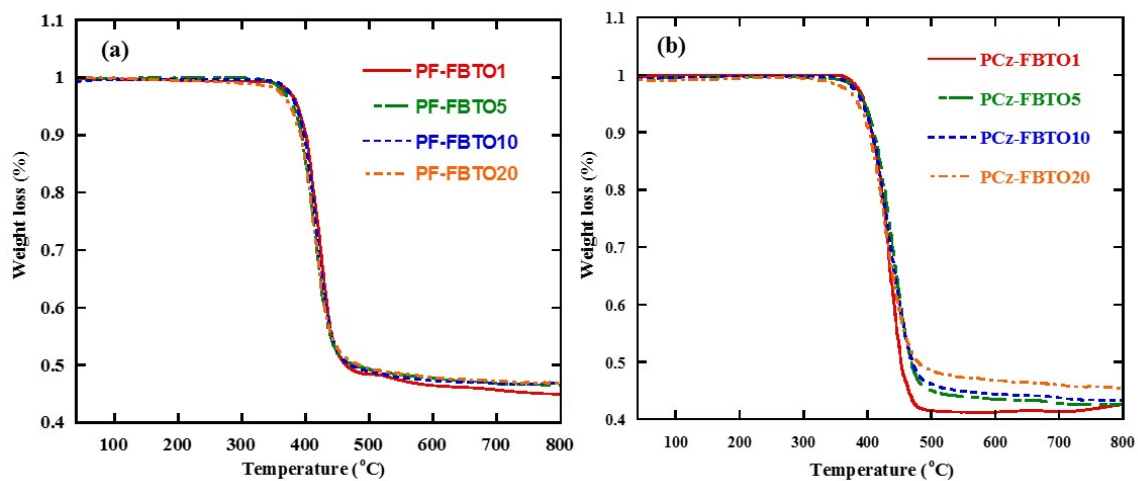

**Fig. S2** TGA curves of copolymers PF-FBTOs and PCz-FBTOs.

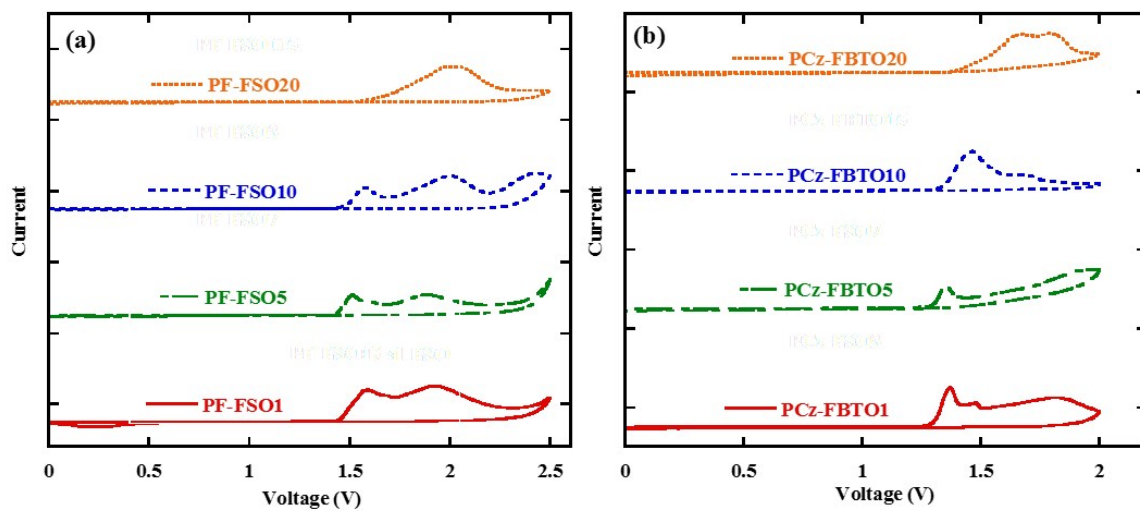

**Fig. S3** Cyclic voltammetry curves of PF-FBTOs (a) and PCz-FBTOs (b)

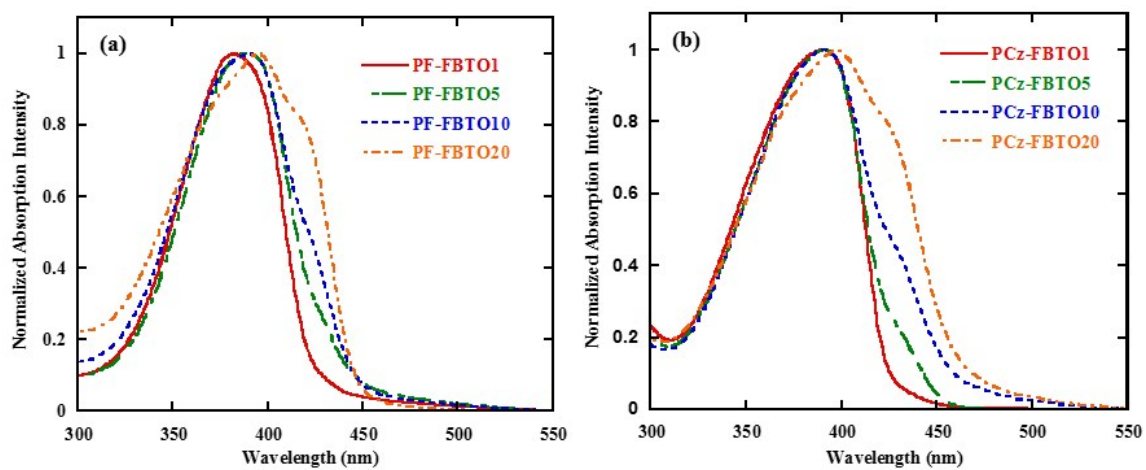

**Fig. S4** Absorption spectra of polymers for PF-FBTOs (a) and PCz-FBTOs (b) in film.

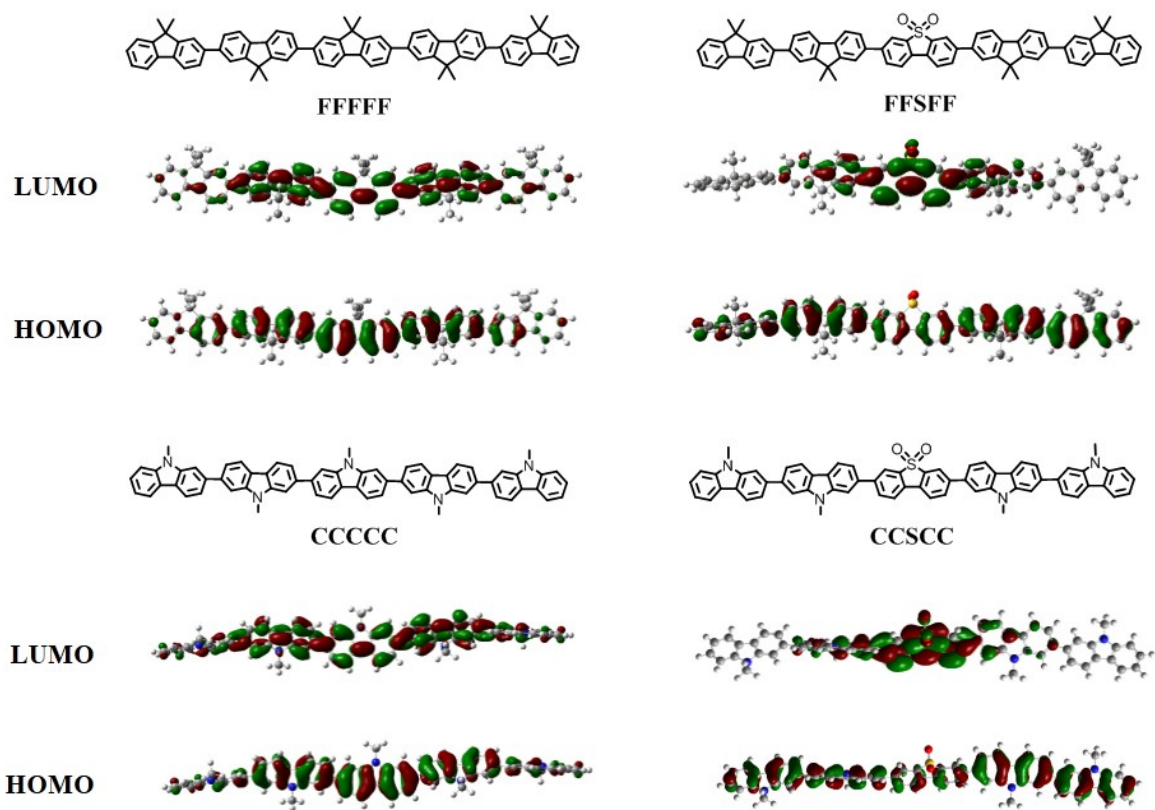

**Fig. S5** Structure and spatial distribution of HOMO and LUMO in model molecules.

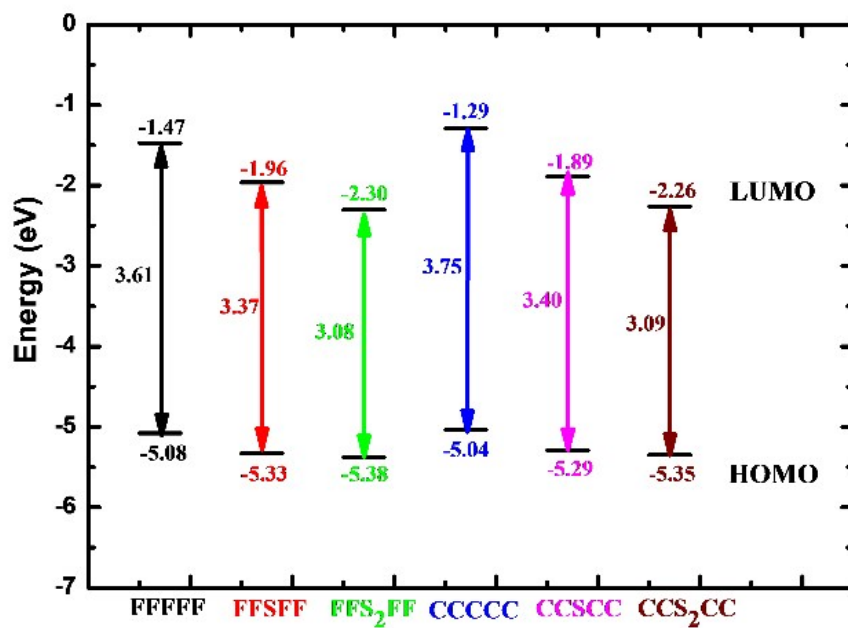

**Fig. S6** Energy level diagram for FFFFF, FFSFF, FFS<sub>2</sub>FF, CCCCC, CCSCC and CCS<sub>2</sub>CC.

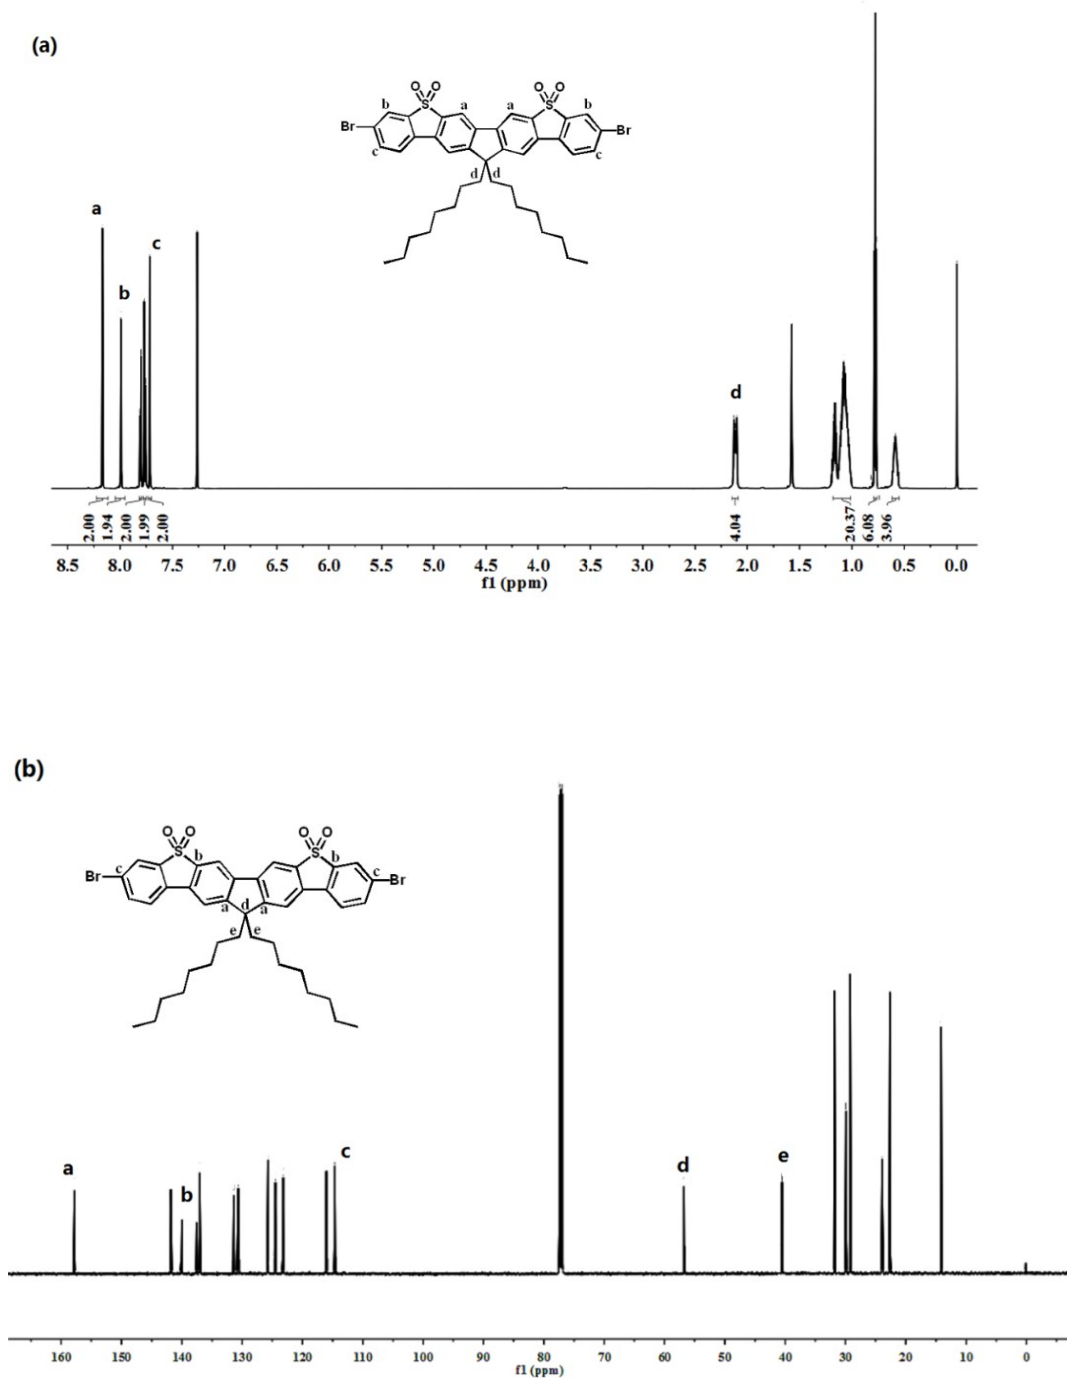

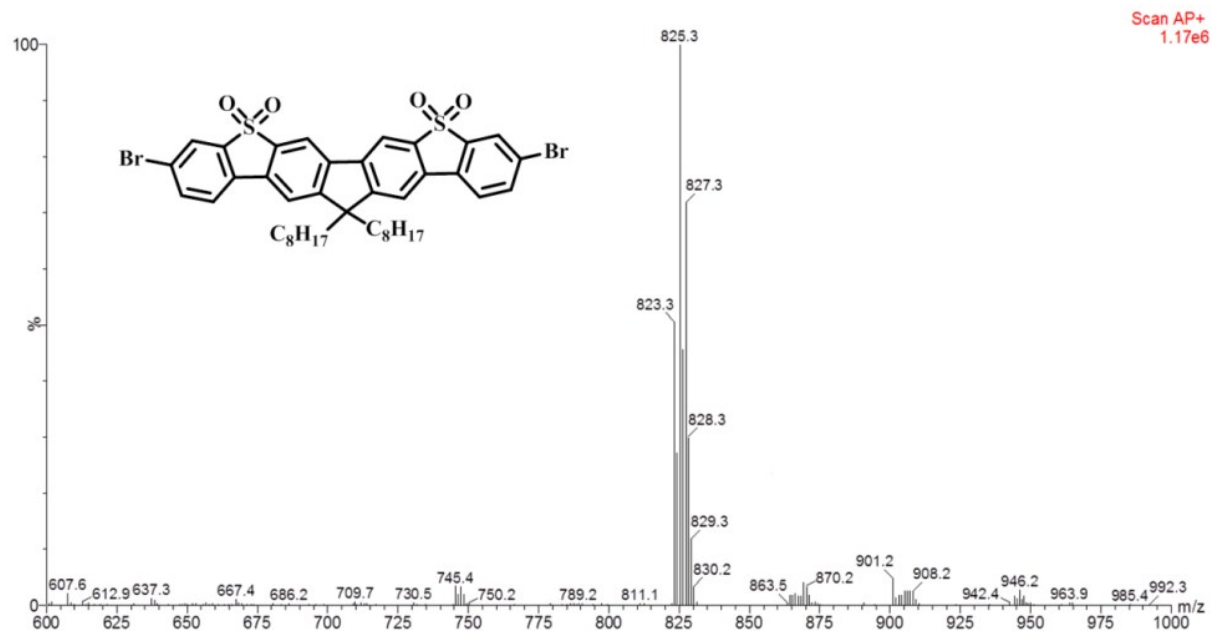

**Fig. S8** The LC-MS spectra of BrFBTO.
